# Supplementary material for: Formation and manipulation of cell spheroids using a density adjusted PEG/DEX aqueous two phase system
Source: PubMed Central journal article supplement (PMC4491721; doi:10.1038/srep11891), 2015-07-06
Supplement: srep11891-s2.pdf [file srep11891-s2.pdf]

**Supplementary Information**

**Formation and manipulation of cell spheroids using a density adjusted PEG/DEX aqueous two phase system**

Chungmin Han<sup>1</sup>, Shuichi Takayama<sup>2\*</sup> and Jaesung Park<sup>1,3\*\*</sup>

**Figure S1**

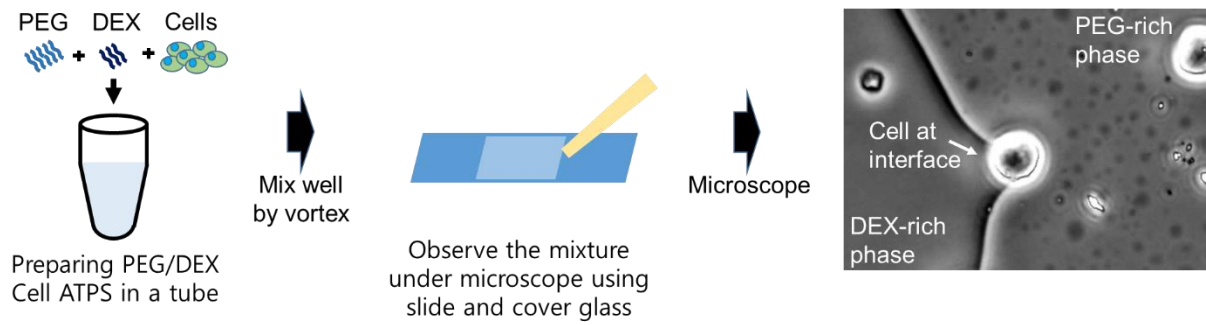

Contact angle measurement. Well-mixed PEG/DEX/cell mixture was observed under phase-contrast microscope. Sample was mount using slide and cover glasses. By chance, a few cells were trapped at PEG/DEX phase interface. Contact angle observation indicated that DEX-cell interactions are more favorable than PEG-cell interactions.

**Figure S2**

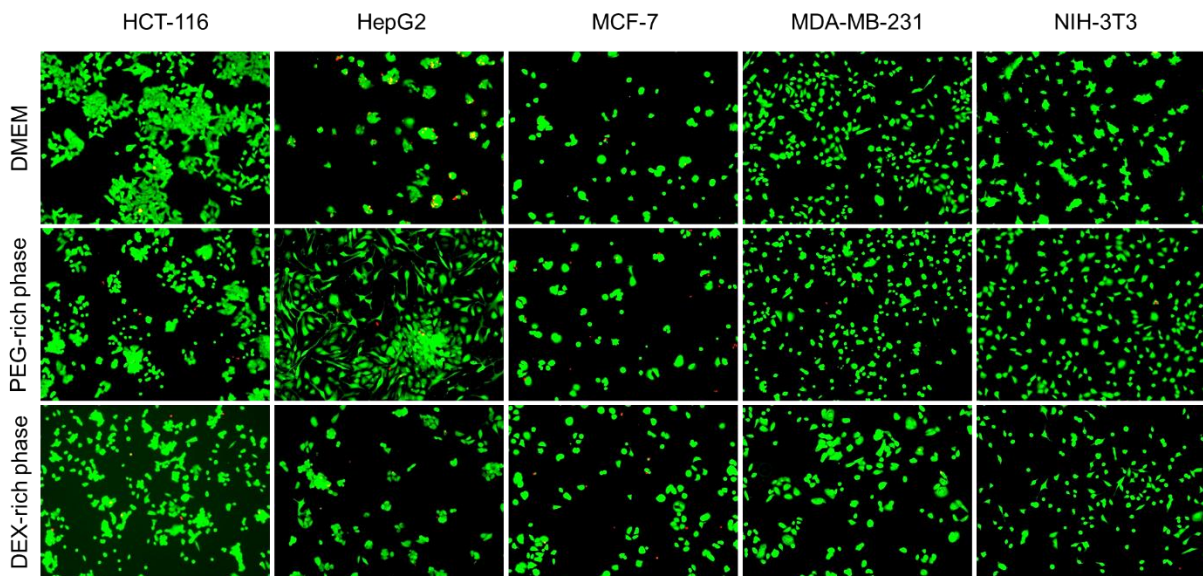

PEG and DEX cytotoxicity determination. HCT-116, HepG2, MCF-7, MDA-MB-231 and NIH-3T3 cells were first cultured with normal growth media, PEG- and DEX-rich phases for 48 hours. After that, cells were stained with calcein AM and ethidium homo-dimer for live and dead analysis. Green (calcein AM) signal indicates live cells and red (ethidium homo-dimer) signal indicates dead cells.

**Figure S3**

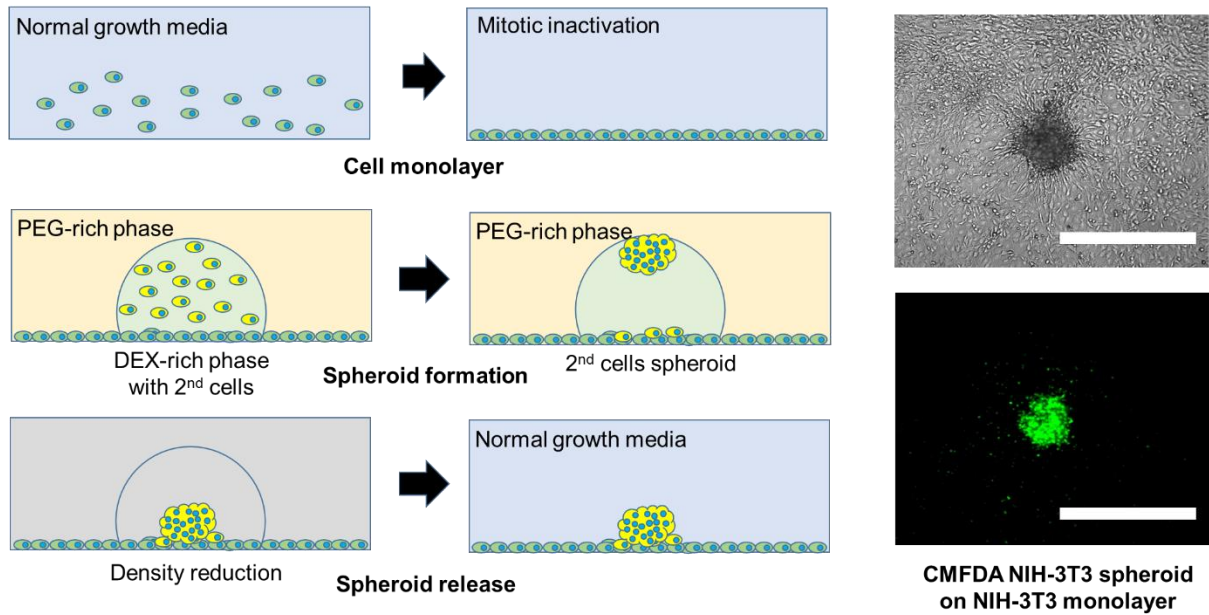

Spheroid-monolayer co-culture system. First, 1<sup>st</sup> cell types were culture as monolayer in normal growth media. After the culture reaches ~90% confluent, cells were mitotically inactivated by mitomycin c treatment. (left top) Then, 2<sup>nd</sup> cell types were patterned using DEX-in-PEG ATPS for spheroid formation for 2 days. (left mid) When spheroid was formed, polymer free media was added to the culture to release the spheroid on previously formed 1<sup>st</sup> cell type monolayer. After 1 day incubation, polymer media was changed to fresh and polymer free media for further analysis. (left bottom) Microscopic picture was taken with CMFDA labeled NIH-3T3 spheroid cultured on non-labeled NIH-3T3 monolayer. (right) Scale bars: 400  $\mu$ m

**Table 1S.** Primers for real time quantitative PCR

| <b>Name</b>         | <b>Ref. Seq. #</b> | <b>Sequence</b>            | <b>Size (bp)</b> | <b>Etc.</b>   |
|---------------------|--------------------|----------------------------|------------------|---------------|
| Actb<br>(Actin)     | NM_007393.3        | Fwd- ACGTTGACATCCGTAAAGAC  | 100              | House Keeping |
|                     |                    | Rev- GCAGTAATCTCCTTCTGCAT  |                  |               |
| Pou5f1<br>(Oct-3/4) | NM_013633.3        | Fwd- GTTGGAGAAGGTGGAACCAA  | 61               | Pluripotency  |
|                     |                    | Rev- CTCCTTCTGCAGGGCTTTC   |                  |               |
| Brachyury           | NM_009309.2        | Fwd- CAGCCACCTACTGGCTCTA   | 72               | Mesoderm      |
|                     |                    | Rev- GAGCCTGGGGTGATGGTA    |                  |               |
| Hand1               | NM_008213.2        | Fwd- CAAGCGGAAAAGGGAGTTG   | 84               | Mesoderm      |
|                     |                    | Rev- GTGCGCCCTTTAATCCTCTT  |                  |               |
| Gata4               | NM_008092.3        | Fwd- GGAAGACACCCCAATCTCG   | 72               | Endoderm      |
|                     |                    | Rev- CATGGCCCCACAATTGAC    |                  |               |
| Sox1                | NM_009233.3        | Fwd- GTGACATCTGCCCCATC     | 60               | Ectoderm      |
|                     |                    | Rev- GAGGCCAGTCTGGTGTGTCAG |                  |               |
| Otx2                | NM_144841.4        | Fwd- AGAATCCAGGGTGCAGGTAT  | 98               | Ectoderm      |
|                     |                    | Rev- CAGGCCTCACTTTGTTCTGA  |                  |               |
